# Supplementary material for: Effects of exercise on the sleep microarchitecture in the aging brain: A study on a sedentary sample
Source: Front Syst Neurosci. 2022 Oct 26;16:855107. doi: 10.3389/fnsys.2022.855107 (PMC9644157; doi:10.3389/fnsys.2022.855107)
Supplement: Supplementary file 1 [file Table_2.XLSX]

## Sheet: Tabelle1
Frequency [Hz]	AUC	AUCCi
0	0.719136	0.540123	0.87037
1	0.185185	0.0493827	0.353395
2	0.148148	0.0339506	0.294753
3	0.0895062	0.0123457	0.197531
4	0.108025	0.0246914	0.225309
5	0.209877	0.0802469	0.376543
6	0.296296	0.138889	0.481481
7	0.388889	0.197531	0.58642
8	0.481481	0.283951	0.685185
9	0.533951	0.33642	0.731481
10	0.469136	0.280864	0.666667
11	0.361111	0.188272	0.552469
12	0.324074	0.160494	0.509259
13	0.478395	0.290123	0.675926
14	0.611111	0.416667	0.796296
15	0.679012	0.490741	0.848765
16	0.768519	0.598765	0.910494
17	0.820988	0.671296	0.941358
18	0.82716	0.675926	0.950617
19	0.876543	0.753086	0.969136
20	0.858025	0.716049	0.962963
21	0.873457	0.740741	0.972222
22	0.82716	0.679012	0.947531
23	0.87963	0.743827	0.978395
24	0.848765	0.709877	0.95679
25	0.842593	0.691358	0.953704
26	0.824074	0.675926	0.938272
27	0.839506	0.697531	0.944444
28	0.858025	0.725309	0.953704
29	0.845679	0.70679	0.950617
30	0.87963	0.756173	0.966049
31	0.839506	0.697531	0.947531
32	0.814815	0.660494	0.938272
33	0.814815	0.657407	0.935185
34	0.790123	0.623457	0.916667
35	0.787037	0.623457	0.919753
36	0.796296	0.635802	0.929012
37	0.796296	0.62963	0.929012
38	0.796296	0.635802	0.927469
39	0.777778	0.604938	0.916667
40	0.811728	0.657407	0.938272
41	0.790123	0.632716	0.919753
42	0.79321	0.632716	0.919753
43	0.802469	0.648148	0.929012
44	0.771605	0.608025	0.907407
45	0.811728	0.660494	0.932099
46	0.774691	0.606481	0.91358
47	0.799383	0.641975	0.932099
48	0.796296	0.632716	0.92284
49	0.777778	0.608025	0.919753
50	0.787037	0.626543	0.92284
51	0.783951	0.617284	0.91358
52	0.777778	0.604938	0.91358
53	0.780864	0.614198	0.916667
54	0.787037	0.626543	0.919753
55	0.765432	0.592593	0.907407
56	0.774691	0.598765	0.92284
57	0.783951	0.617284	0.919753
58	0.780864	0.611111	0.925926
59	0.799383	0.635802	0.935185
60	0.552469	0.358025	0.734568
61	0.774691	0.604938	0.91358
62	0.771605	0.600309	0.910494
63	0.787037	0.62037	0.919753
64	0.79321	0.623457	0.932099
65	0.765432	0.589506	0.907407
66	0.802469	0.635802	0.938272
67	0.790123	0.626543	0.932099
68	0.783951	0.611111	0.925926
69	0.79321	0.626543	0.932099
70	0.783951	0.614198	0.92284
71	0.79321	0.623457	0.929012
72	0.753086	0.574074	0.907407
73	0.805556	0.641975	0.941358
74	0.780864	0.608025	0.92284
75	0.805556	0.645062	0.938272
76	0.777778	0.601852	0.92284
77	0.796296	0.626543	0.935185
78	0.774691	0.598765	0.919753
79	0.802469	0.632716	0.938272
80	0.774691	0.598765	0.919753
81	0.777778	0.601852	0.92284
82	0.787037	0.617284	0.929012
83	0.780864	0.604938	0.925926
84	0.762346	0.584877	0.91358
85	0.768519	0.595679	0.916667
86	0.771605	0.598765	0.916667
87	0.780864	0.608025	0.919753
88	0.743827	0.567901	0.895062
89	0.756173	0.580247	0.910494
90	0.765432	0.57716	0.916667
91	0.79321	0.623457	0.932099
92	0.777778	0.601852	0.919753
93	0.762346	0.58642	0.907407
94	0.759259	0.583333	0.907407
95	0.759259	0.583333	0.907407
96	0.765432	0.58642	0.910494
97	0.756173	0.574074	0.907407
98	0.802469	0.632716	0.941358
99	0.774691	0.595679	0.919753
100	0.682099	0.493827	0.861111
101	0.759259	0.574074	0.91358
102	0.771605	0.595679	0.92284
103	0.771605	0.595679	0.91821
104	0.762346	0.580247	0.907407
105	0.777778	0.601852	0.929012
106	0.783951	0.608025	0.925926
107	0.762346	0.58642	0.910494
108	0.762346	0.58642	0.91358
109	0.783951	0.604938	0.92284
110	0.774691	0.601852	0.925926
111	0.740741	0.552469	0.907407
112	0.780864	0.608025	0.919753
113	0.787037	0.617284	0.935185
114	0.762346	0.583333	0.91358
115	0.771605	0.595679	0.916667
116	0.774691	0.598765	0.919753
117	0.774691	0.598765	0.92284
118	0.802469	0.635802	0.941358
119	0.756173	0.570988	0.91358
120	0.790123	0.62037	0.932099
121	0.787037	0.617284	0.929012
122	0.765432	0.589506	0.916667
123	0.765432	0.583333	0.916667
124	0.790123	0.62037	0.932099
125	0.759259	0.574074	0.916667
126	0.771605	0.598765	0.916667
127	0.740741	0.561728	0.895062
128	0.5	0.305556	0.691358
