# Supplementary material for: Effects of exercise on the sleep microarchitecture in the aging brain: A study on a sedentary sample
Source: Front Syst Neurosci. 2022 Oct 26;16:855107. doi: 10.3389/fnsys.2022.855107 (PMC9644157; doi:10.3389/fnsys.2022.855107)
Supplement: Supplementary file 2 [file Table_3.XLSX]

## Sheet: Tabelle1
Frequency [Hz]	AUC	AUC Ci
0	0	0	0
1	0.4	0	0.8
2	0.4	0	0.8
3	0.4	0	0.8
4	0.6	0.2	1
5	0.4	0	0.8
6	0.6	0.2	1
7	0.6	0.2	1
8	0.2	0	0.6
9	0.6	0.2	1
10	0.6	0.2	1
11	0.4	0	0.8
12	0.4	0	0.8
13	0.2	0	0.6
14	0.2	0	0.6
15	0.2	0	0.6
16	0.2	0	0.6
17	0.2	0	0.6
18	0.2	0	0.6
19	0.2	0	0.6
20	0.2	0	0.6
21	0.2	0	0.6
22	0.2	0	0.6
23	0.2	0	0.6
24	0.2	0	0.6
25	0.2	0	0.6
26	0.2	0	0.6
27	0.2	0	0.6
28	0.2	0	0.6
29	0.2	0	0.6
30	0.2	0	0.6
31	0.2	0	0.6
32	0.2	0	0.6
33	0.2	0	0.6
34	0.2	0	0.6
35	0.2	0	0.6
36	0.2	0	0.6
37	0.4	0	0.8
38	0.2	0	0.6
39	0.2	0	0.6
40	0.2	0	0.6
41	0.2	0	0.6
42	0.2	0	0.6
43	0.2	0	0.6
44	0.2	0	0.6
45	0.2	0	0.6
46	0.2	0	0.6
47	0.4	0	0.8
48	0.2	0	0.6
49	0.2	0	0.6
50	0.2	0	0.6
51	0.2	0	0.6
52	0.2	0	0.6
53	0.2	0	0.6
54	0.2	0	0.6
55	0.2	0	0.6
56	0.2	0	0.6
57	0.2	0	0.6
58	0.4	0	0.8
59	0.2	0	0.6
60	0	0	0
61	0.2	0	0.6
62	0.4	0	0.8
63	0.2	0	0.6
64	0.2	0	0.6
65	0.2	0	0.6
66	0.2	0	0.6
67	0.2	0	0.6
68	0.2	0	0.6
69	0.4	0	0.8
70	0.2	0	0.6
71	0.2	0	0.6
72	0.2	0	0.6
73	0.4	0	0.8
74	0.4	0	0.8
75	0.2	0	0.6
76	0.2	0	0.6
77	0.2	0	0.6
78	0.4	0	0.8
79	0.4	0	0.8
80	0.4	0	0.8
81	0.2	0	0.6
82	0.2	0	0.6
83	0.4	0	0.8
84	0	0	0
85	0.2	0	0.6
86	0.4	0	0.8
87	0.2	0	0.6
88	0	0	0
89	0.4	0	0.8
90	0.4	0	0.8
91	0	0	0
92	0	0	0
93	0.2	0	0.6
94	0.2	0	0.6
95	0.4	0	0.8
96	0	0	0
97	0.4	0	0.8
98	0.2	0	0.6
99	0.2	0	0.6
100	0	0	0
101	0	0	0
102	0	0	0
103	0.2	0	0.6
104	0	0	0
105	0.2	0	0.6
106	0.2	0	0.6
107	0.4	0	0.8
108	0.2	0	0.6
109	0.2	0	0.6
110	0	0	0
111	0.4	0	0.8
112	0	0	0
113	0.2	0	0.6
114	0	0	0
115	0.2	0	0.6
116	0	0	0
117	0	0	0
118	0.2	0	0.6
119	0.4	0	0.8
120	0.2	0	0.6
121	0.2	0	0.6
122	0.2	0	0.6
123	0	0	0
124	0	0	0
125	0.2	0	0.6
126	0	0	0
127	0.2	0	0.6
128	0	0	0
